# Supplementary material for: Monitoring of thiocyanate as a biomarker in saliva and serum samples by a combination of solid-phase extraction based on a layered double hydroxide nano-sorbent and gas chromatography
Source: Royal Society of Chemistry journal article supplement (doi:10.1039/c4ay00347k), 2014-01-01
Supplement: c4ay00347k1.pdf [file c4ay00347k1.pdf]

## **Electronic Supplementary Material**

# **Monitoring of thiocyanate as a biomarker in saliva and serum samples by combination of solid-phase extraction based on a layered double hydroxide nano-sorbent with gas chromatography**

Hossein Abdolmohammad-Zadeh\*, Hakimeh Vasli

*Department of Chemistry, Faculty of Sciences, Azarbaijan Shahid Madani University, 35*

*Km Tabriz-Marageh Road, P.O. Box 53714-161, Tabriz, Iran*

\* Corresponding author. Tel.: +98 4124327500, Fax: +98 4124327541

E-mail addresses: h.abdol@azaruniv.edu, h\_abdol@yahoo.com

(A)

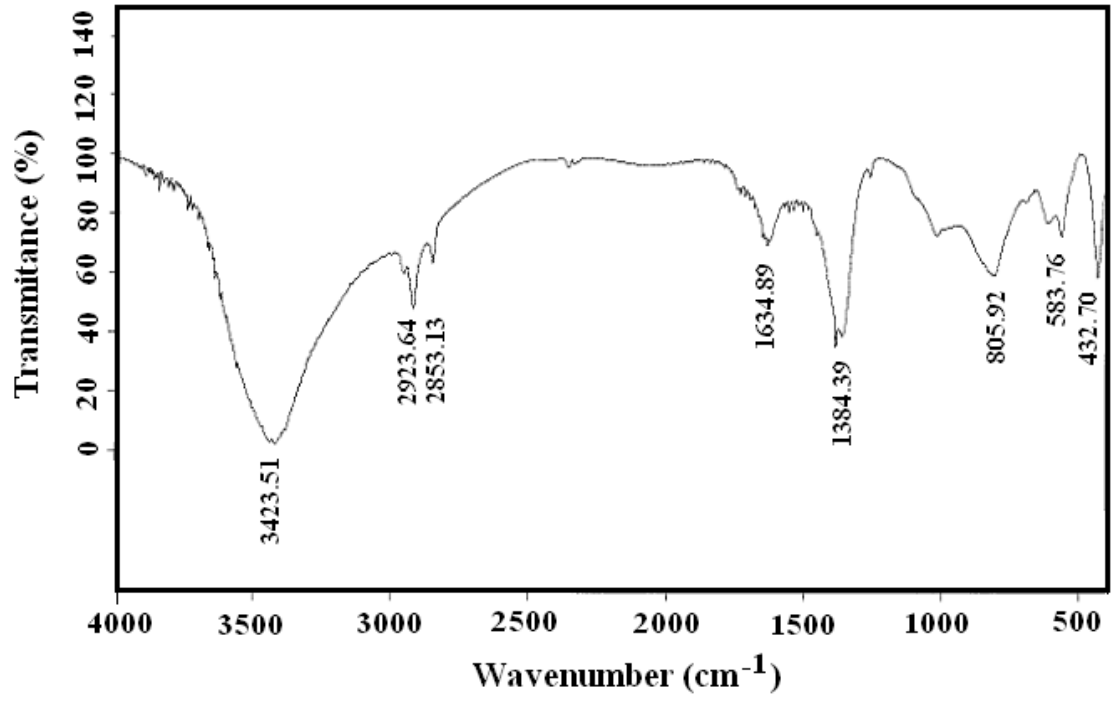

(B)

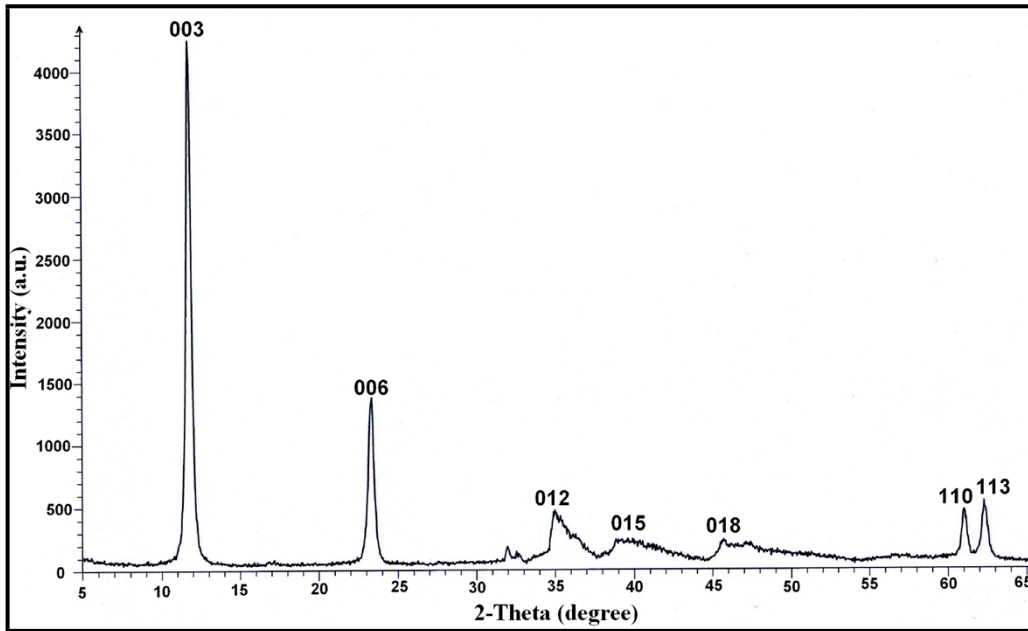

(C)

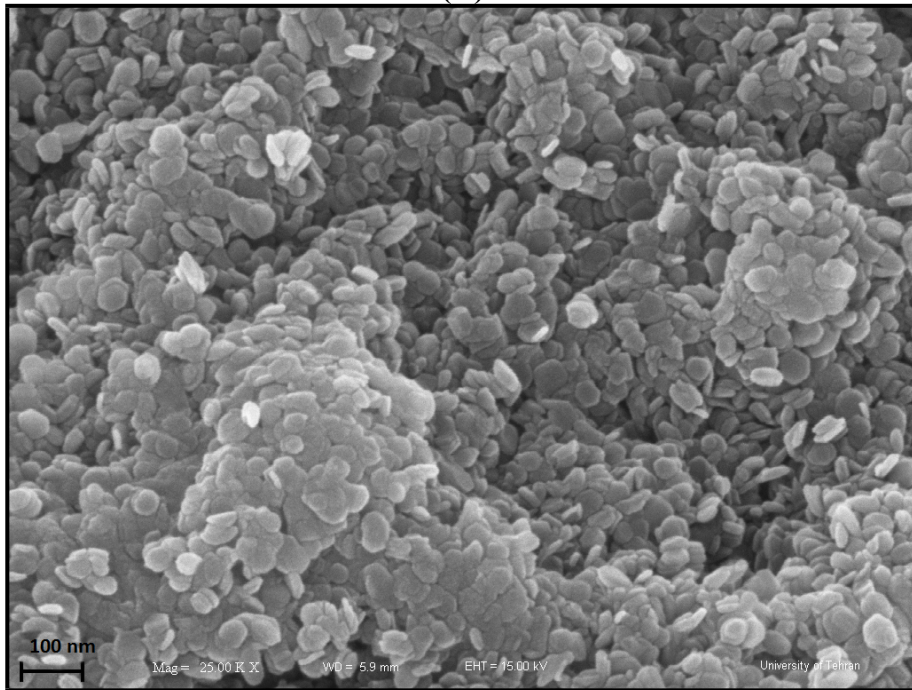

(D)

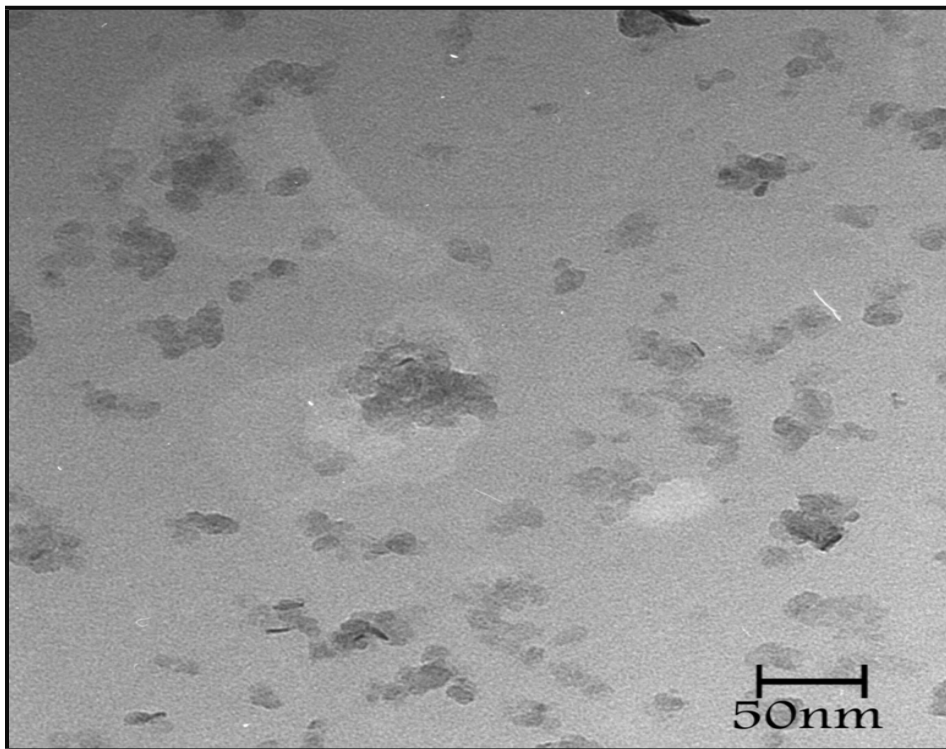

(A) FT-IR spectrum, (B) XRD pattern, (C) SEM image, and (D) TEM image of Ni-Al(NO<sub>3</sub>)<sub>3</sub> LDH.
